# Supplementary material for: Discovery of Orexant and Anorexant Agents with Indazole Scaffold Endowed with Peripheral Antiedema Activity
Source: PubMed Central journal article supplement (PMC6770484; doi:10.3390/biom9090492), 2019-09-16

**DISCOVERY OF OREXANT AND ANOREXANT AGENTS WITH INDAZOLE  
SCAFFOLD ENDOWED WITH PERIPHERAL ANTIEDEMA ACTIVITY**

Marilisa, P. Dimmito<sup>1</sup>, Azzurra Stefanucci<sup>1,\*</sup>, Stefano Pieretti<sup>2</sup>, Paola Minosi<sup>2</sup>, Szabolcs Dvoráckó<sup>3</sup>, Csaba Tömböly<sup>3</sup>, Gokhan Zengin<sup>4</sup>, Adriano Mollica<sup>1</sup>

<sup>1</sup> Department of Pharmacy, University of Chieti-Pescara “G. d’Annunzio”, Via dei Vestini 31, 66100 Chieti, Italy.

<sup>2</sup> Istituto Superiore di Sanità, Centro Nazionale Ricerca e Valutazione Preclinica e Clinica dei farmaci, Viale Regina Elena 299, 00161 Rome, Italy.

<sup>3</sup> Institute of Biochemistry, Biological Research Centre of the Hungarian Academy of Sciences, Temesvári krt. 62. 6726 Szeged, Hungary.

<sup>4</sup> Department of Biology, Science Faculty, Selcuk University, Konya, Turkey.

*Corresponding author: a.stefanucci@unich.it*

| <b>Table of contents</b>                    | <b>Pages</b> |
|---------------------------------------------|--------------|
| Analytical RP-HPLC traces <b>LONI 10-12</b> | S2           |
| LRMS <b>LONI10-12</b>                       | S3-S5        |
| <sup>1</sup> H NMR <b>LONI10-12</b>         | S6-S8        |
| <b>LONI10-12</b> characterization           | S9           |
| Molecular modeling and MD details           | S10-S13      |

## Analytical RP-HPLC traces

### LONI 10: Loni Val-NH-CH<sub>3</sub>

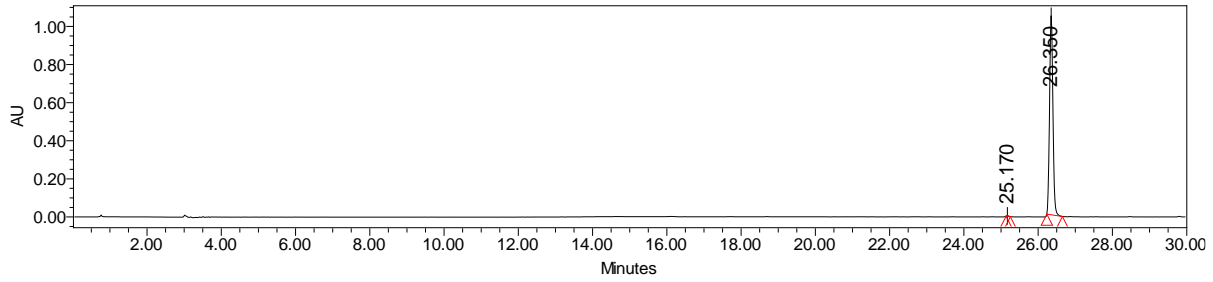

|   | Retention Time | Area    | % Area | Height  |
|---|----------------|---------|--------|---------|
| 1 | 25.170         | 12506   | 0.19   | 3115    |
| 2 | 26.350         | 6545480 | 99.81  | 1039046 |

### LONI 11: Loni *tert*-Leu-NH-CH<sub>3</sub>

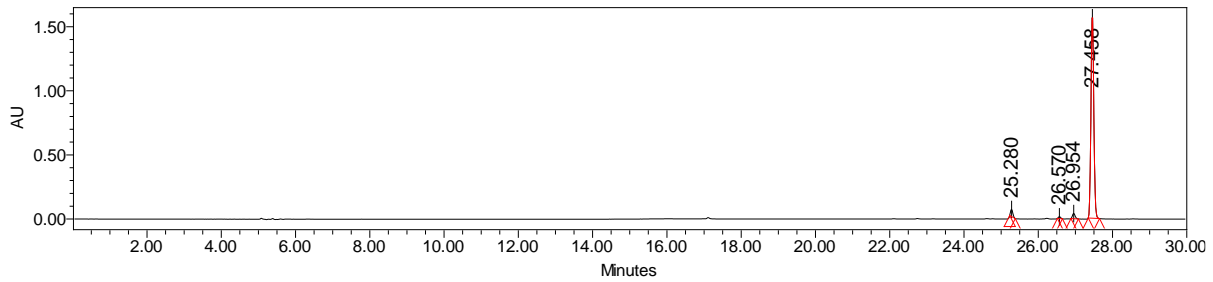

|   | Retention Time | Area    | % Area | Height  |
|---|----------------|---------|--------|---------|
| 4 | 27.458         | 8457289 | 95.17  | 1573124 |
| 3 | 26.954         | 203285  | 2.27   | 40579   |
| 2 | 26.570         | 62830   | 0.40   | 14578   |
| 1 | 25.280         | 229110  | 2.26   | 54476   |

### LONI 12: Loni Leu-NH-CH<sub>3</sub>

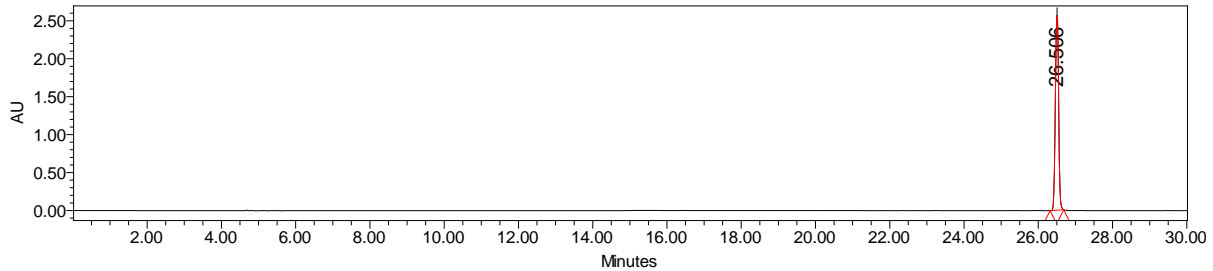

# LRMS LONI 10

LCQ Instrument Control 12 Jul 2019 08:19 AM

S#: 1802 IT: 25.81 ST: 1.48

NL: 3.38e+006

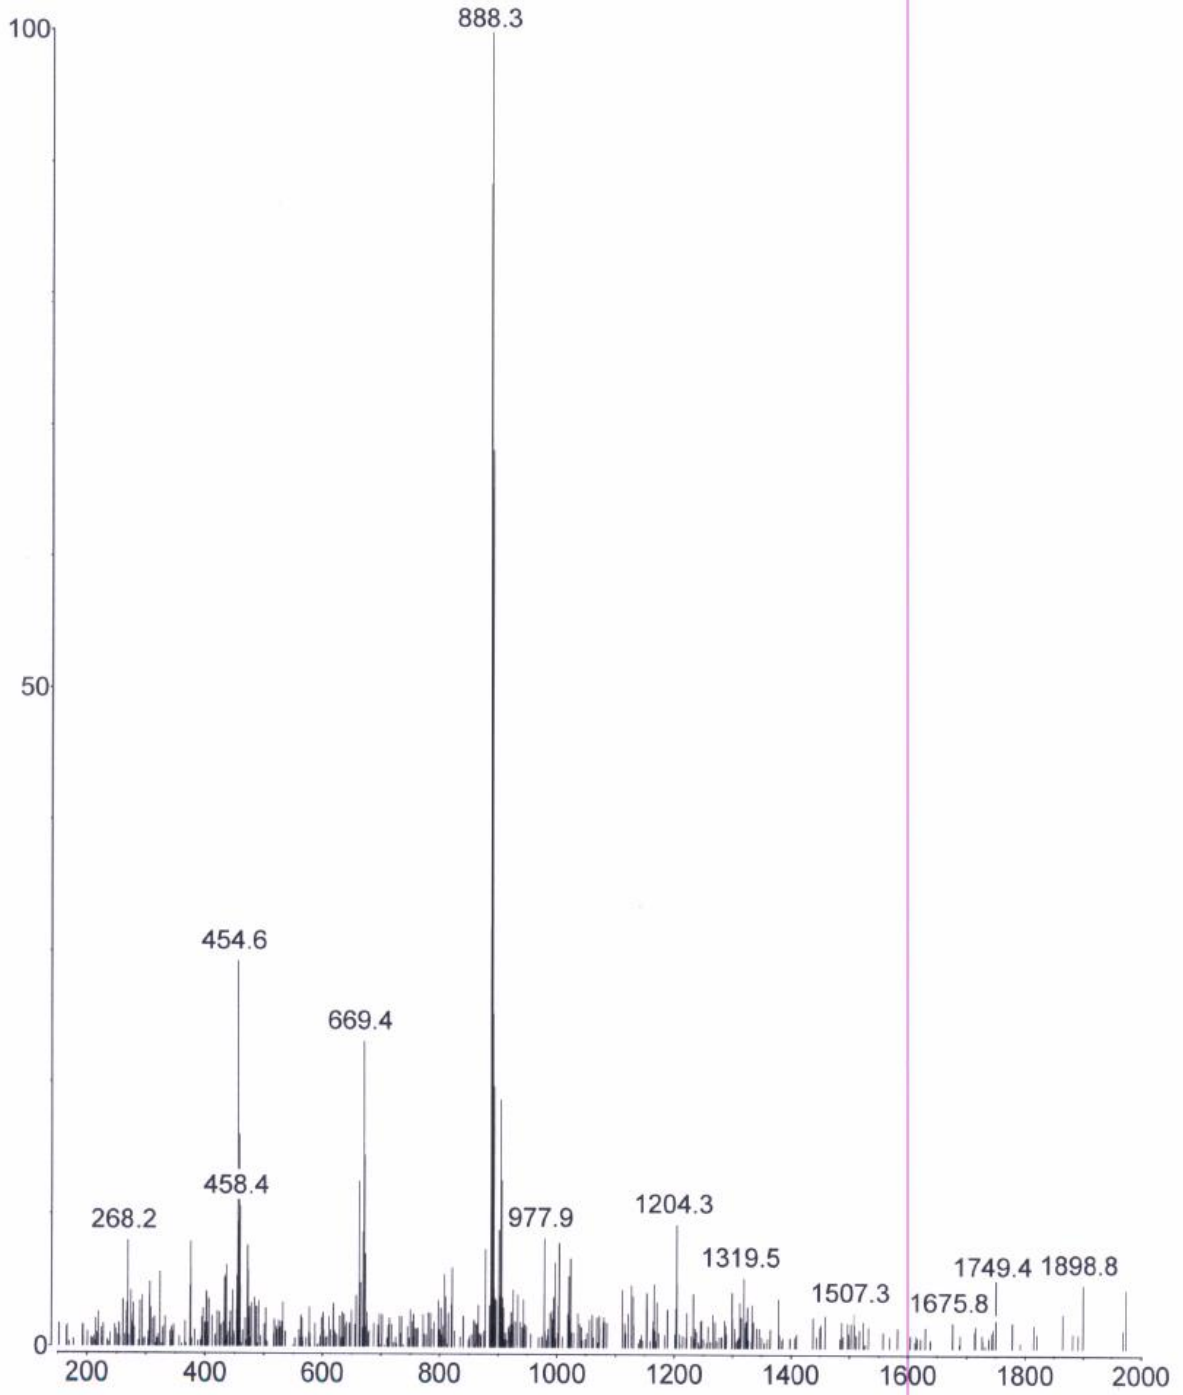

LRMS LONI 11

LCQ Instrument Control 12 Jul 2019 08:45 AM

S#: 3163 IT: 33.53 ST: 1.51

NL: 3.47e+006

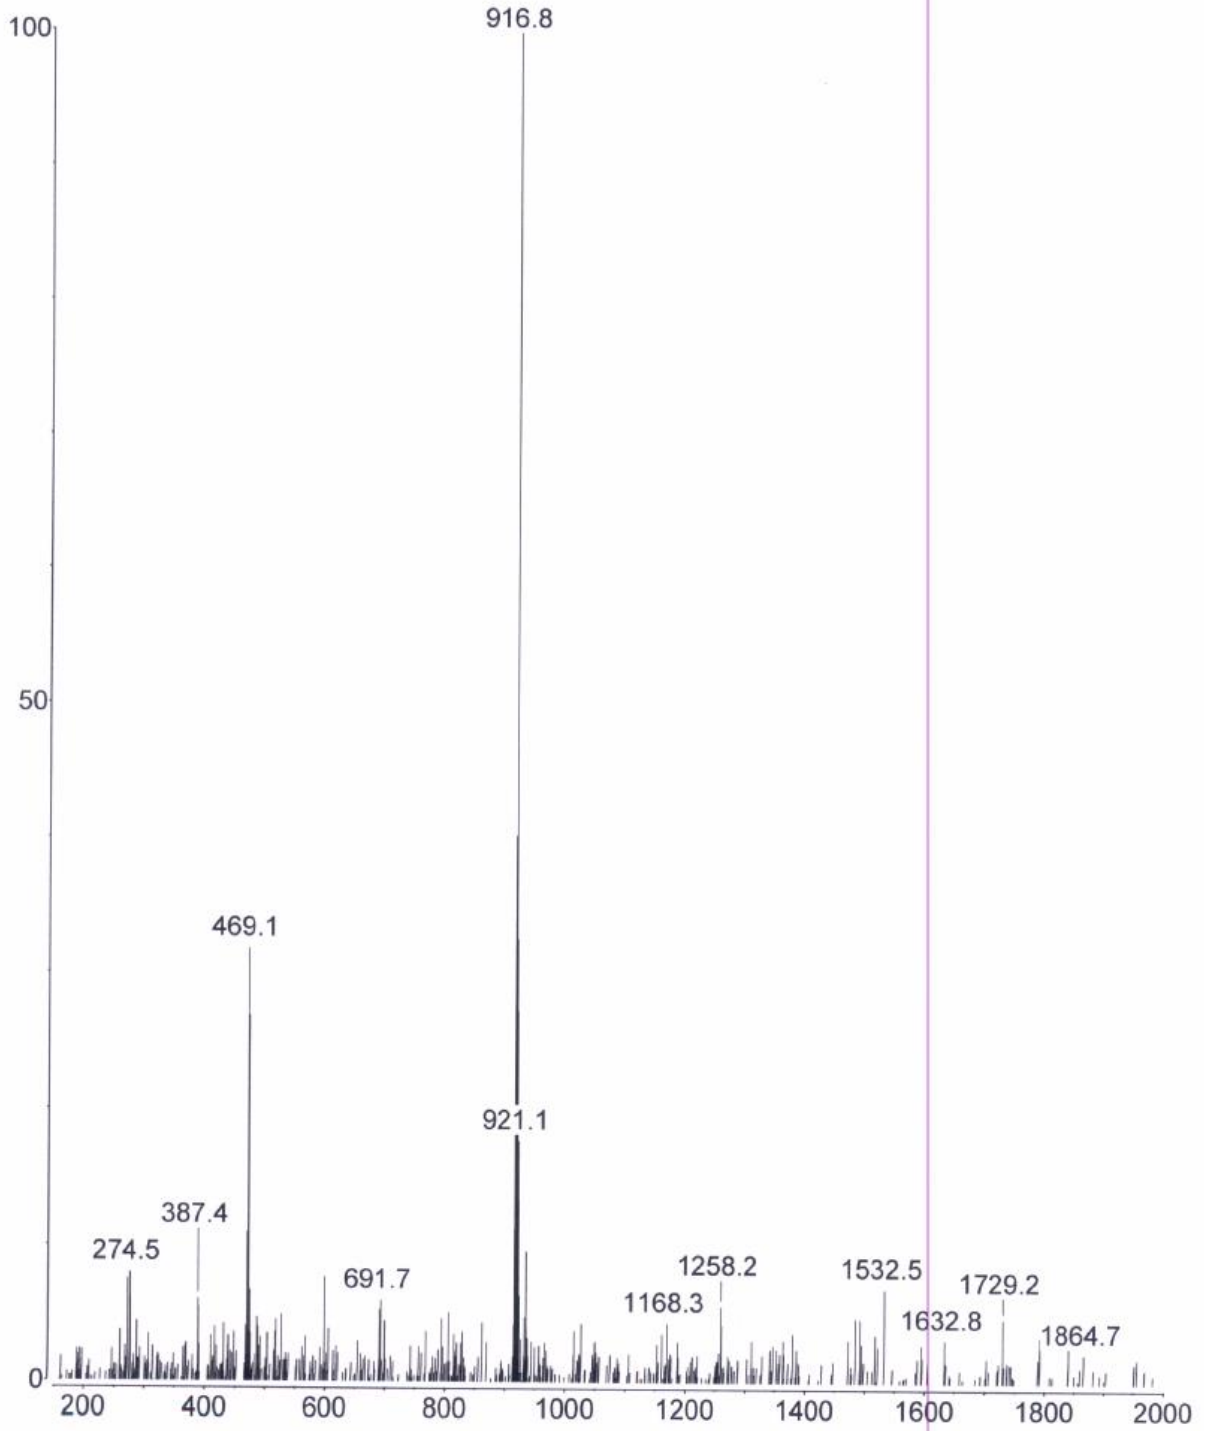

# LRMS LONI 12

LCQ Instrument Control 12 Jul 2019 08:32 AM

S#: 2486 IT: 21.99 ST: 1.48

NL: 5.51e+006

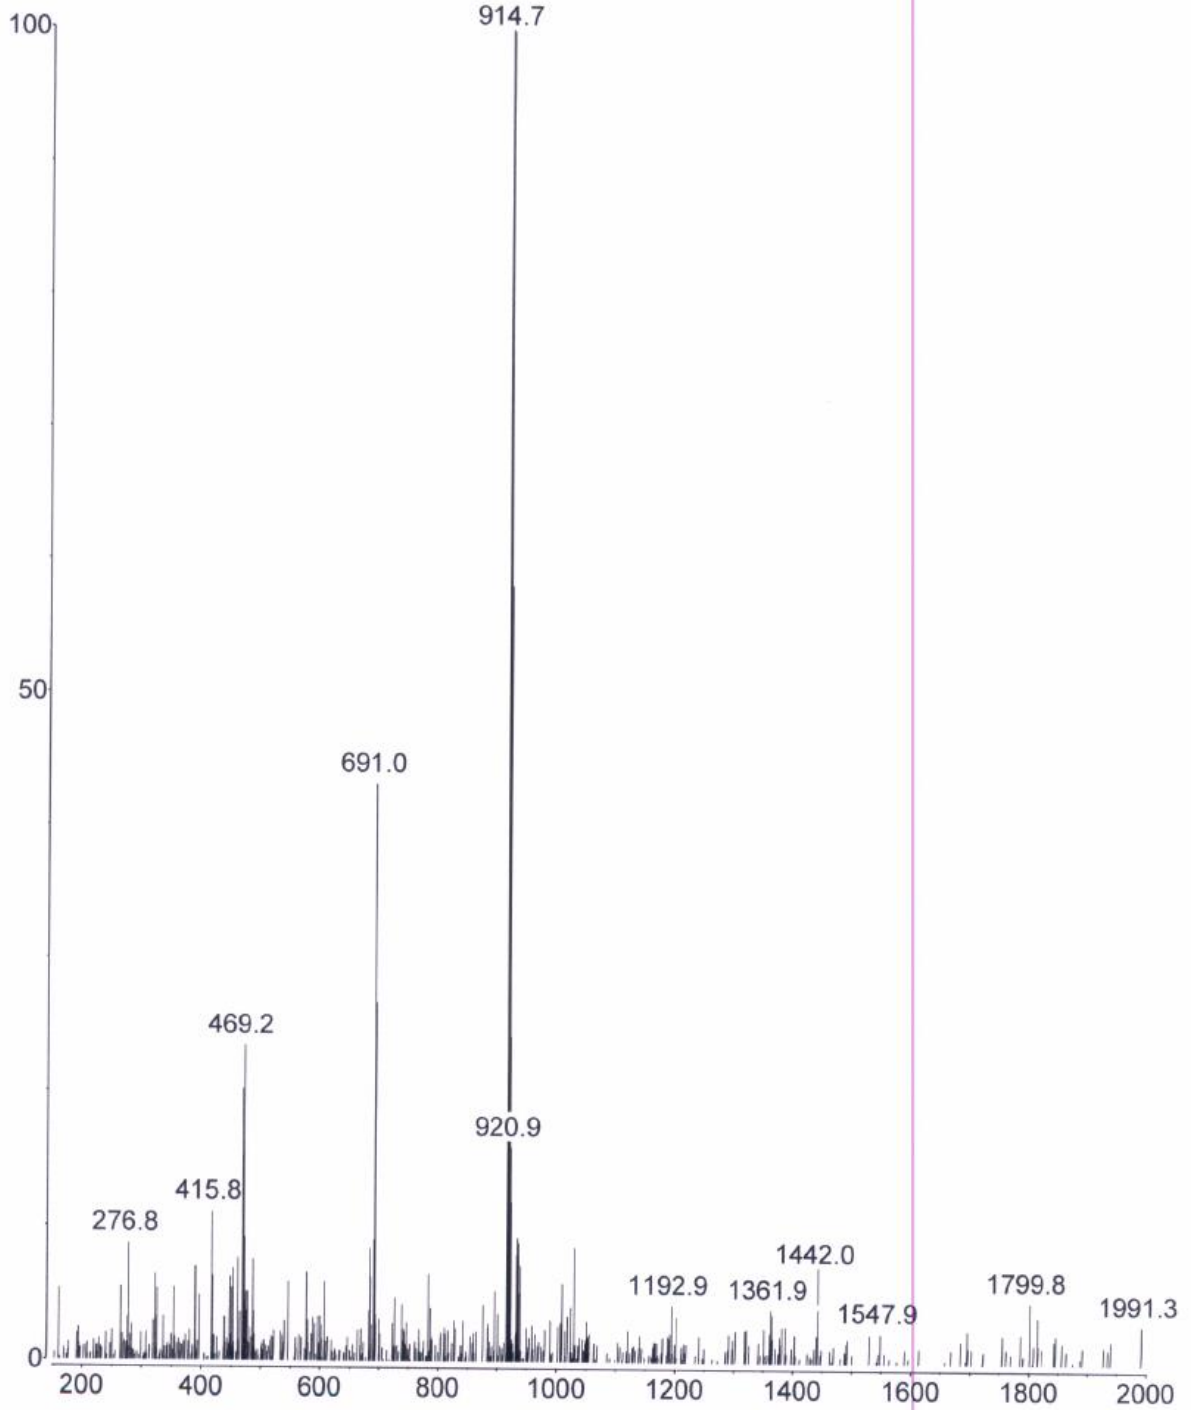

<sup>1</sup>H NMR LONI 10 in DMSO-d<sub>6</sub>

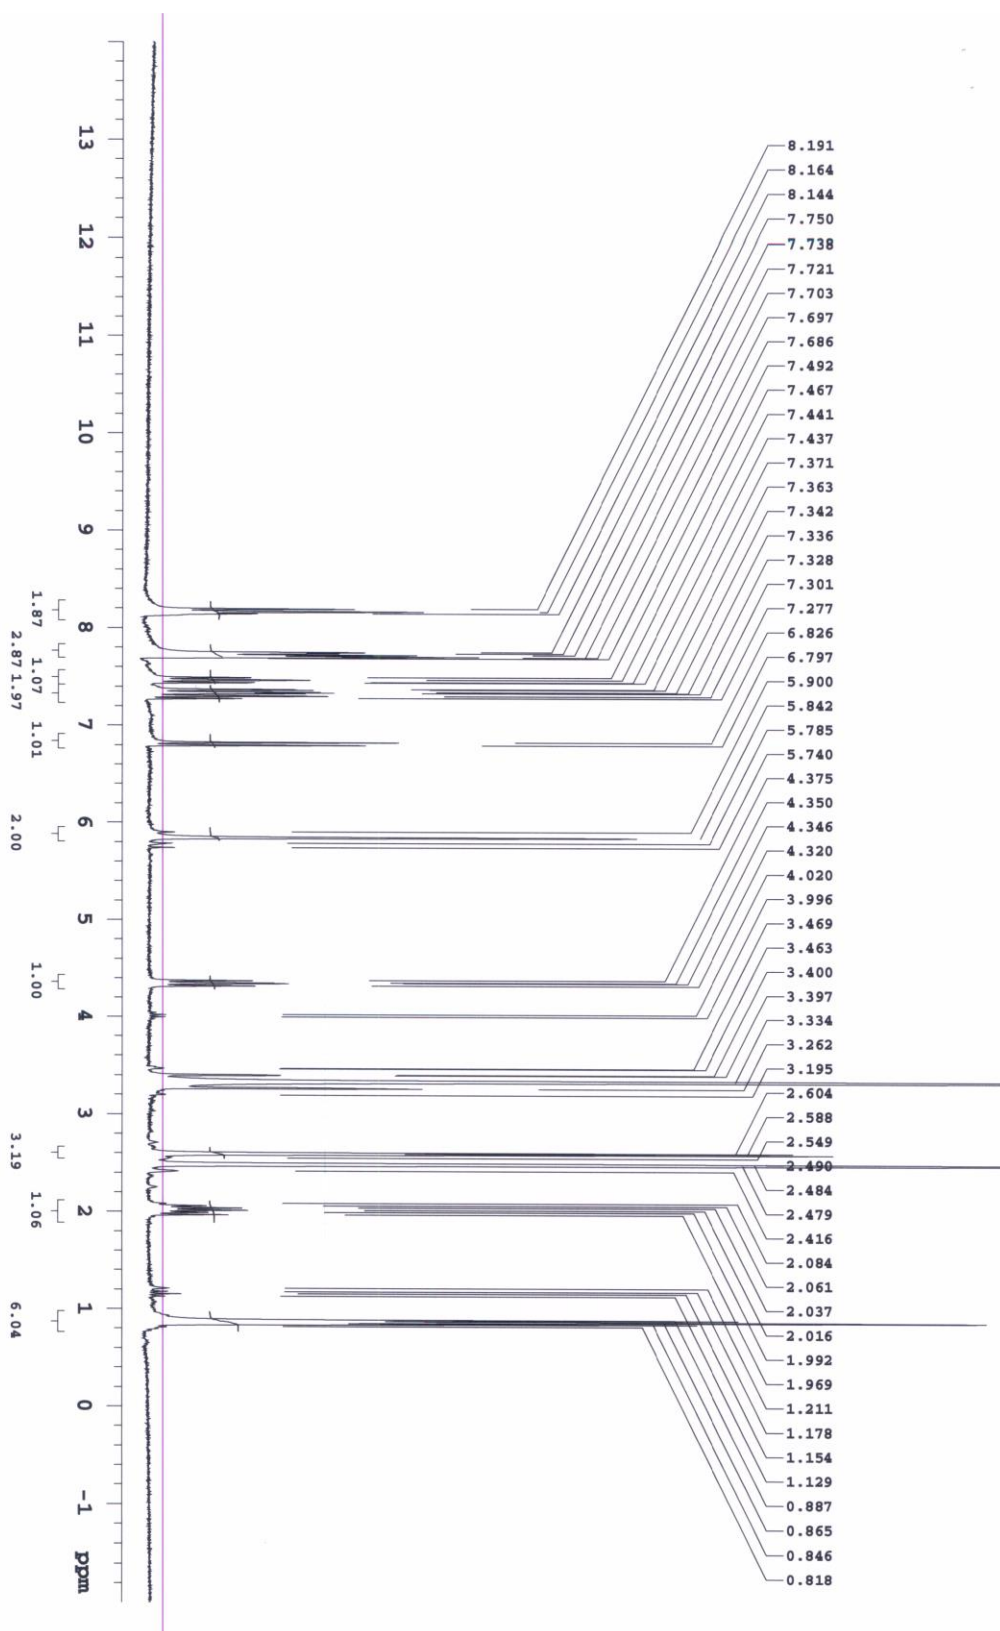

**<sup>1</sup>H NMR LONI 11 in DMSO-d<sub>6</sub>**

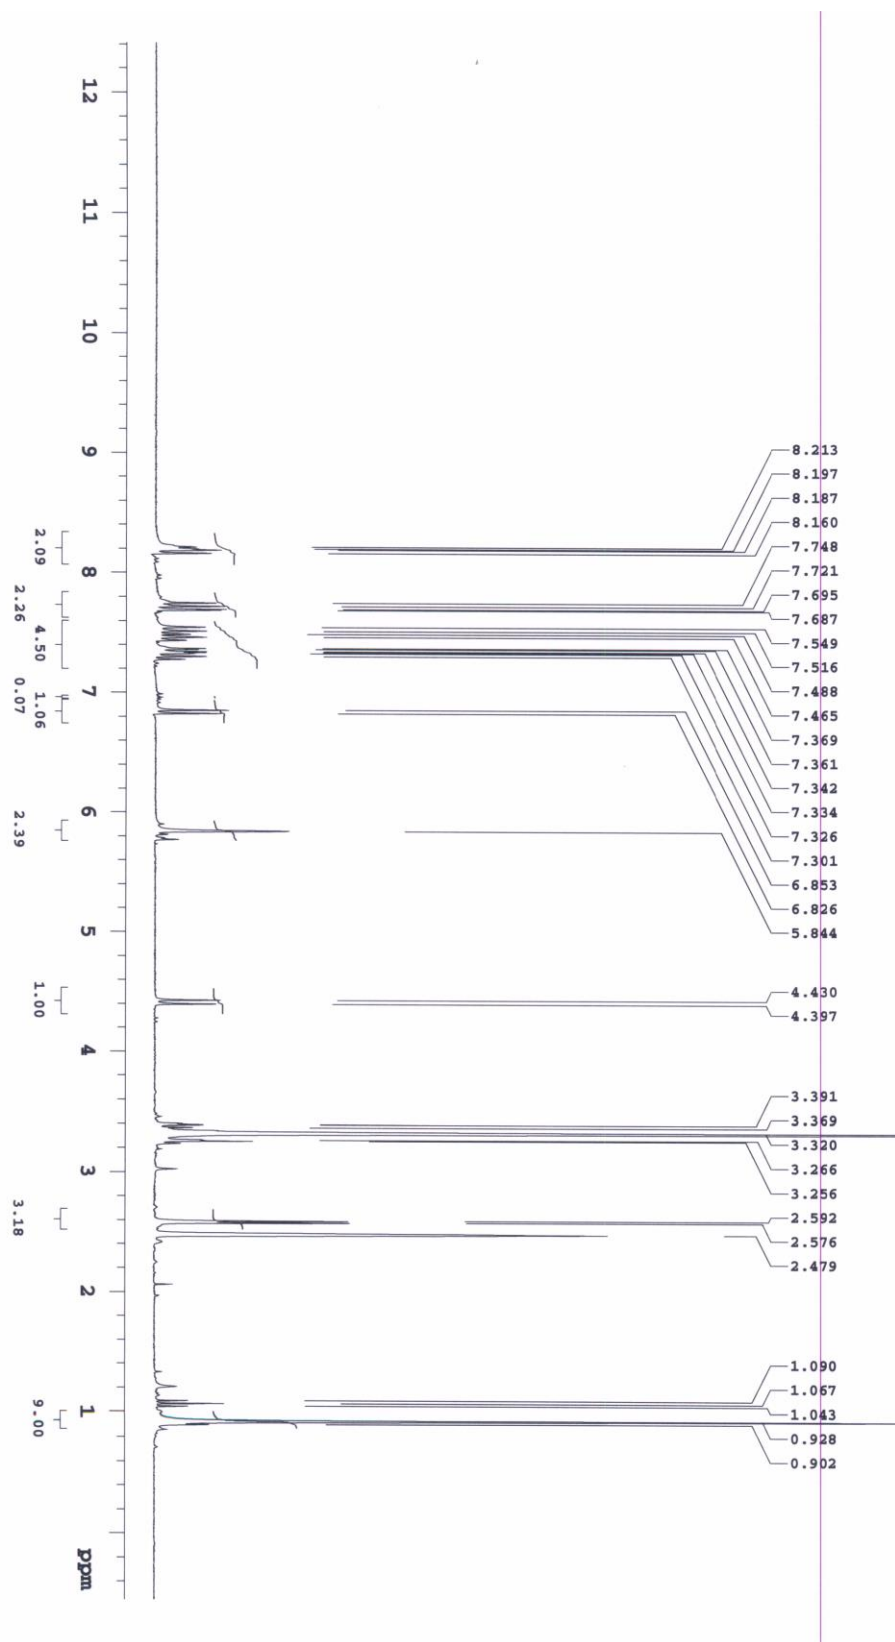

<sup>1</sup>H NMR LONI 12 in DMSO-d<sub>6</sub>

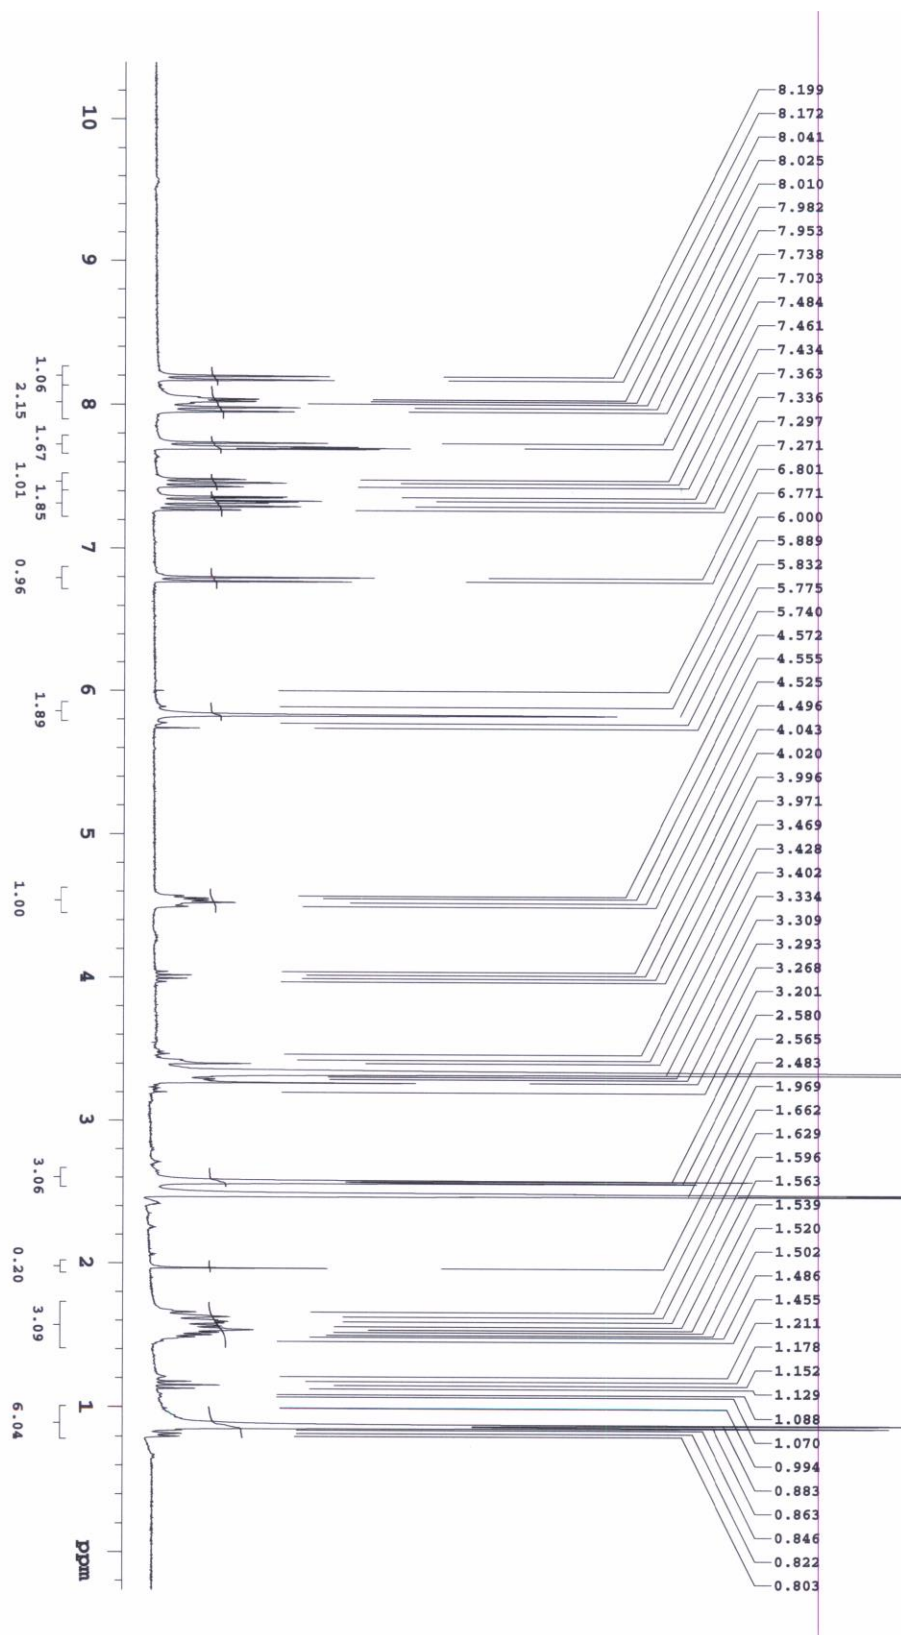



### LONI10-12 characterization:

(S)-1-(2,4-dichlorobenzyl)-*N*-(3-methyl-1-(methylamino)-1-oxobutan-2-yl)-1H-indazole-3-carboxamide (LONI10). Compound LONI4 was transformed in the *N*-methyl amide derivative LONI10 following the general procedure. The desired compound was obtained in 96% yield, after reaction work up. Rt (analytical HPLC) = 26.35 min. <sup>1</sup>H NMR (300 MHz, DMSO-*d*<sub>6</sub>) δ 8.19-8.14 (m, 2H, H1 and NH amide), 7.75-7.68 (m, 3H, H4, NH(CH<sub>3</sub>), H-3), 7.49-7.27 (m, 3H, H-2, H2, H3), 6.81 (d, 1H, H-1), 5.84 (s, 2H, -CH<sub>2</sub>-), 6.77 (d, 1H, H7), 5.84 (s, 2H, H-1), 4.35 (t, 1H, CH<sup>α</sup> Val), 2.56 (d, 3H, NH-CH<sub>3</sub> Val), 2.05 (m, 1H, CH(CH<sub>3</sub>)<sub>2</sub> Val), 0.85 (dd, 6H, CH<sub>3</sub>x2 Val). <sup>13</sup>C NMR (300 MHz, DMSO-*d*<sub>6</sub>) δ 171.5, 161.5, 141.5, 137.9, 133.7, 133.4, 130.8, 129.5, 128.2, 127.7, 123.3, 122.5, 122.2, 110.9, 57.7, 50.1, 49.1, 31.5, 25.8, 19.6, 18.7. LRMS calcd. for C<sub>21</sub>H<sub>22</sub>Cl<sub>2</sub>N<sub>4</sub>O<sub>2</sub>: 432.1; found: 454.6 [M+Na]<sup>+</sup>.

(S)-1-(2,4-dichlorobenzyl)-*N*-(3,3-dimethyl-1-(methylamino)-1-oxobutan-2-yl)-1H-indazole-3-carboxamide (LONI11). Compound LONI1 was transformed in the *N*-methyl amide derivative LONI11 following the general procedure. The desired compound was obtained in 97% yield, after reaction work up. Rt (analytical HPLC) = 27.45 min. <sup>1</sup>H NMR (300 MHz, DMSO-*d*<sub>6</sub>) δ 8.21-8.16 (m, 2H, H1 and NH amide), 7.74-7.68 (m, 2H, H4 and NH(CH<sub>3</sub>) *tert*-Leu), 7.54-7.46 (m, 2H, H2 and H-3), 7.36-7.30 (m, 2H, H3 and H-2), 6.84 (d, 1H, H-1), 5.84 (s, 2H, -CH<sub>2</sub>-), 4.42 (d, 1H, CH<sup>α</sup> *tert*-Leu), 2.58 (d, 3H, NH(CH<sub>3</sub>) *tert*-Leu), 0.92 (s, 9H, CH<sub>3</sub>x3 *tert*-Leu). <sup>13</sup>C NMR (300 MHz, DMSO-*d*<sub>6</sub>) δ 170.5, 160.7, 141.5, 137.7, 133.7, 133.5, 130.8, 129.5, 128.2, 127.7, 123.4, 122.4, 122.2, 110.1, 59.3, 49.1, 35.2, 26.9, 25.6. LRMS calcd. for C<sub>22</sub>H<sub>24</sub>Cl<sub>2</sub>N<sub>4</sub>O<sub>2</sub>: 446.1; found: 469.1 [M+Na]<sup>+</sup>.

(S)-1-(2,4-dichlorobenzyl)-*N*-(4-methyl-1-(methylamino)-1-oxopentan-2-yl)-1H-indazole-3-carboxamide (LONI12). Compound LONI7 was transformed in the *N*-methyl amide derivative LONI12 following the general procedure. The desired compound was obtained in quantitative yield, after reaction work up. Rt (analytical HPLC) = 26.50 min. <sup>1</sup>H NMR (300 MHz, DMSO-*d*<sub>6</sub>) δ 8.18 (d, 1H, H1), 8.04-7.95 (m, 2H, H4 and NH(CH<sub>3</sub>)), 7.73-7.70 (m, 2H, H-3 and NH amide), 7.46 (t, 1H, H2), 7.36-7.27 (m, 2H, H-2 and H3), 6.79 (d, 1H, H-1), 5.83 (s, 2H, -CH<sub>2</sub>-), 4.55 (q, 1H, CH<sup>α</sup> Leu), 2.57 (d, 3H, NH(CH<sub>3</sub>) Leu), 1.66-1.45 (m, 3H, CH<sub>2</sub><sup>β</sup> Leu and CH<sup>γ</sup> Leu), 0.87 (dd, 6H, CH<sub>3</sub>x2 Leu). <sup>13</sup>C NMR (300 MHz, DMSO-*d*<sub>6</sub>) δ 172.6, 161.7, 141.4, 138.1, 133.8, 133.2, 130.7, 129.5, 128.2, 127.7, 123.2, 122.6, 122.3, 110.8, 51.2, 50.1, 49.1, 41.7, 26.1, 24.8, 23.3, 22.1. LRMS calcd. for C<sub>22</sub>H<sub>24</sub>Cl<sub>2</sub>N<sub>4</sub>O<sub>2</sub>: 446.1; found: 469.2 [M+Na]<sup>+</sup>.

## Molecular modeling and MD details

**Figure 1S.** (A) MDMB-Fubinaca crystallographic pose (light blue) superimposed to the same self-docked ligand (light brown) by Glide. (B) Superimposition of MDMB-Fubinaca (light blue), LONI11 (violet), LONI4 (light brown) poses.

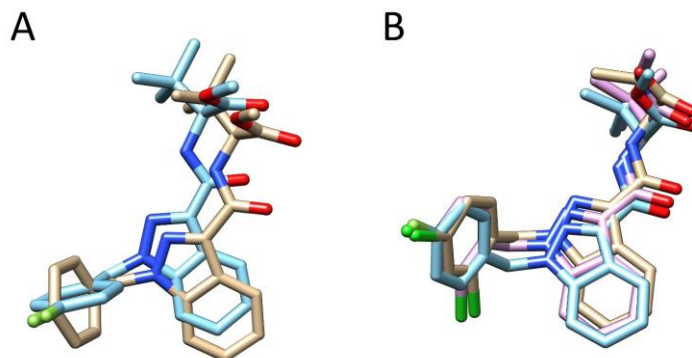

**Figure 2S.** 2D interaction diagram of (A) MDMB-Fubinaca, (B) LONI11 and (C) LONI4 docked to CB1 receptor (pdb id: 6N4B).

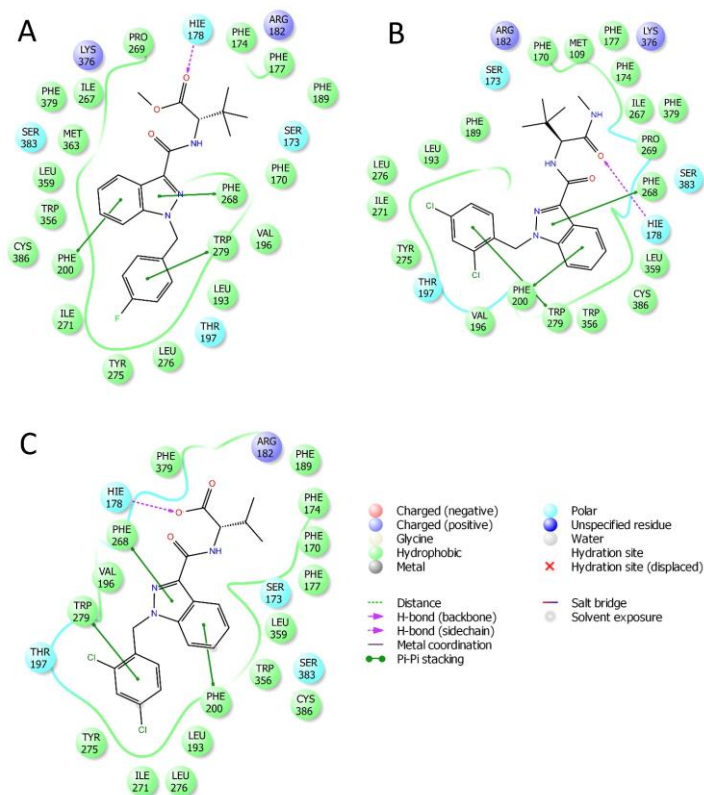

**Figure 3S.** System model used in the molecular dynamic simulation.

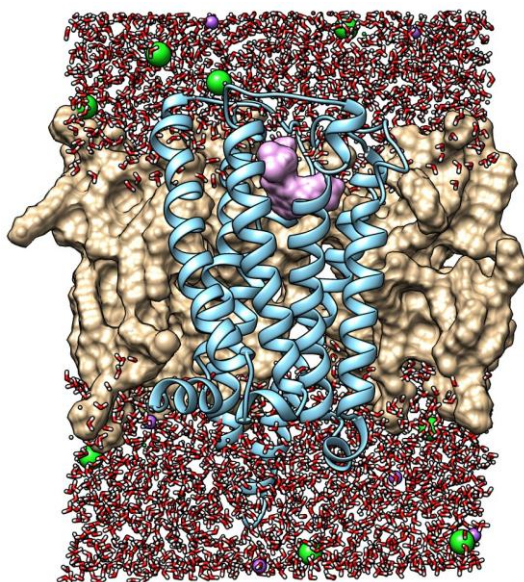



**Figure 5S.** RMSD (angstroms) for ligand MDMB-Fubinaca (A), LONI4 (B) and LONI11 (C) and the receptor CB1 during 20 ns of molecular dynamic simulation.

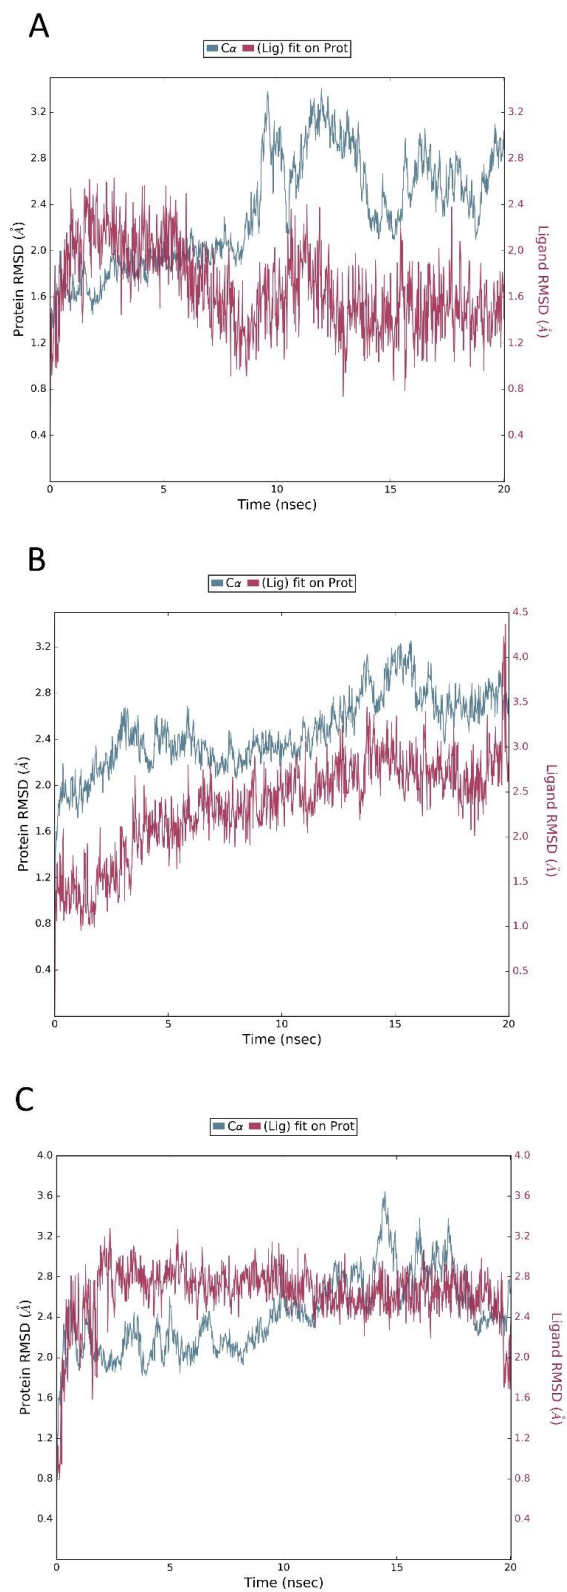

Supplement: biomolecules-09-00492-s001.pdf [file biomolecules-09-00492-s001.pdf]
